# Supplementary material for: The Vitamin A and D Exposure of Cells Affects the Intracellular Uptake of Aluminum Nanomaterials and Its Agglomeration Behavior: A Chemo-Analytic Investigation
Source: PubMed Central journal article supplement (PMC7072912; doi:10.3390/ijms21041278), 2020-02-14
Supplement: ijms-21-01278-s001.pdf [file ijms-21-01278-s001.pdf]

## Supplementary Material

All graphs in the Supplementary Material sections display the metabolic changes of HaCaT cell exposed to  $Al^0$  NM,  $Al_2O_3$  NM and  $AlCl_3 \cdot 6H_2O$  as well as retinol and/or low or high vitamin D3. The results showed for the compounds, which loaded high on factor 1 ( $x \geq 0.95$ ) and therefore are mainly responsible for group separation. For the relative intensity, the mean of the control + retinol group for unexposed HaCaT cells was taken as 100% in all cases. \*\*\*:  $p \leq 0.05$ .

### 5.1 Non-additive, particle specific metabolic effects in co-exposure experiments with $Al_2O_3$ NM, $Al^0$ NM, $AlCl_3 \cdot 6H_2O$ and retinol

Synergistic effects could be observed in co-exposition experiments of  $Al^0$  NM and  $Al_2O_3$  NM and retinol only, but not in co-exposition experiments with  $AlCl_3 \cdot 6H_2O$  and retinol (see Figure 9).

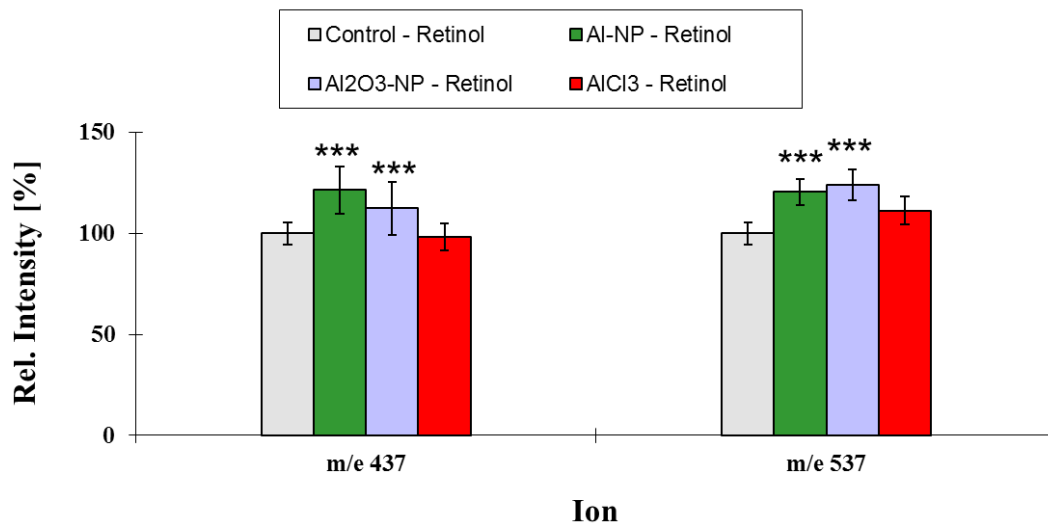

**Figure S1:** Histogram of ion yields for m/e 437 (lyso-phosphatidic acid, Lyso-PA (C18:1)) and m/e 537 (diacylglycerol DG (C30:2))

Additionally synergistic effects can be seen in co-exposure experiments with  $Al_2O_3$  NM and retinol where co-exposition experiments with  $AlCl_3 \cdot 6H_2O$  and retinol show antagonistic effects and co-exposition experiments with  $Al^0$  NM and retinol show similar metabolite level to HaCaT cell, exposed with retinol only (see Figure 10).

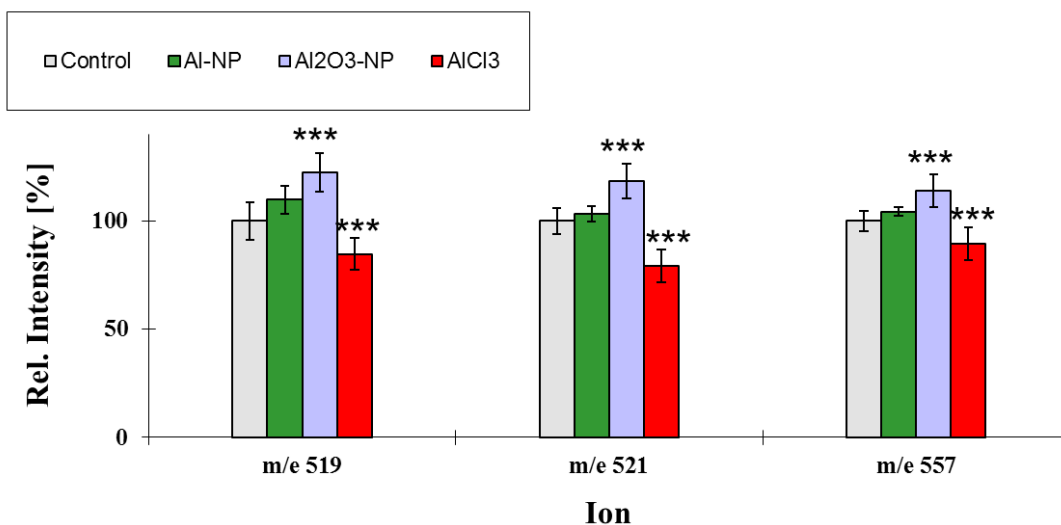

**Figure S2:** Histogram comparisons of ion yields for ion m/e 519 ( lyso-phosphatidic acid, Lyso-PA (C24:2)), ion m/e 521 (lyso-phosphatidic acid, Lyso-PA (C24:1)) and ion m/e 521 (diacylglycerol DG (C32:6)).

5.2 Non-additive, particle specific metabolic effects in co-exposure experiments with Al<sub>2</sub>O<sub>3</sub> NM, Al<sup>0</sup>NM, AlCl<sub>3</sub>\*6H<sub>2</sub>O and low vitamin D3

Specific synergistic effects with ionic AlCl<sub>3</sub>\*6H<sub>2</sub>O and Al<sub>2</sub>O<sub>3</sub> NM in combination with low vitamin D3, which could not be observed in co-exposure experiments of Al<sup>0</sup> NM and low vitamin D3 (see Figure 11) were detected.

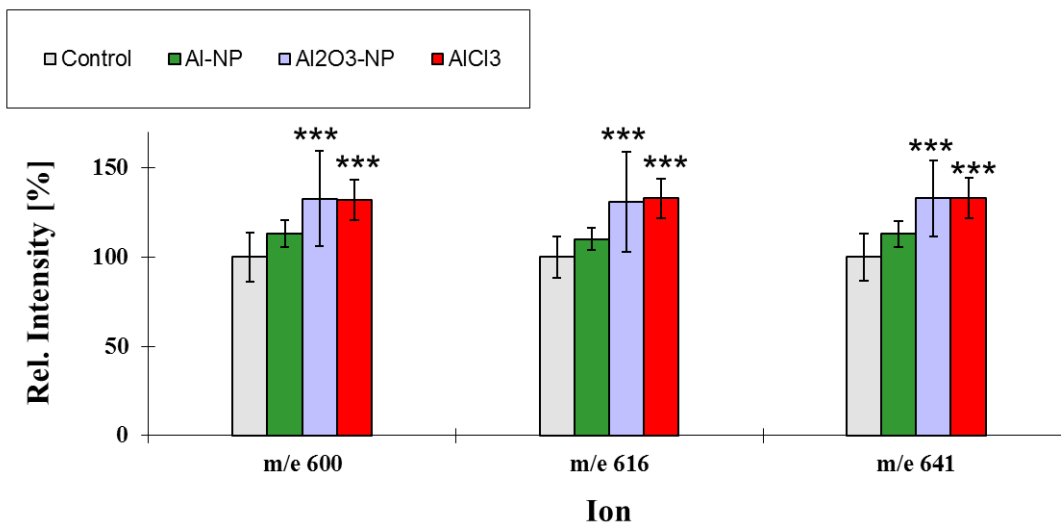

**Figure S3:** Histogram comparisons of ion yields for ion m/e 600 (lyso-phosphatidylcholine, Lyso-PC (C24:4)), ion m/e 616 (diacylglycerol DG (C36:5)) and ion m/e 641 (dihydroceramide Cer (tC40:0)).

Additionally a synergistic effect could only be observed in co-exposure experiments with Al<sup>0</sup> NM and low vitamin D3 (see Figure 12).

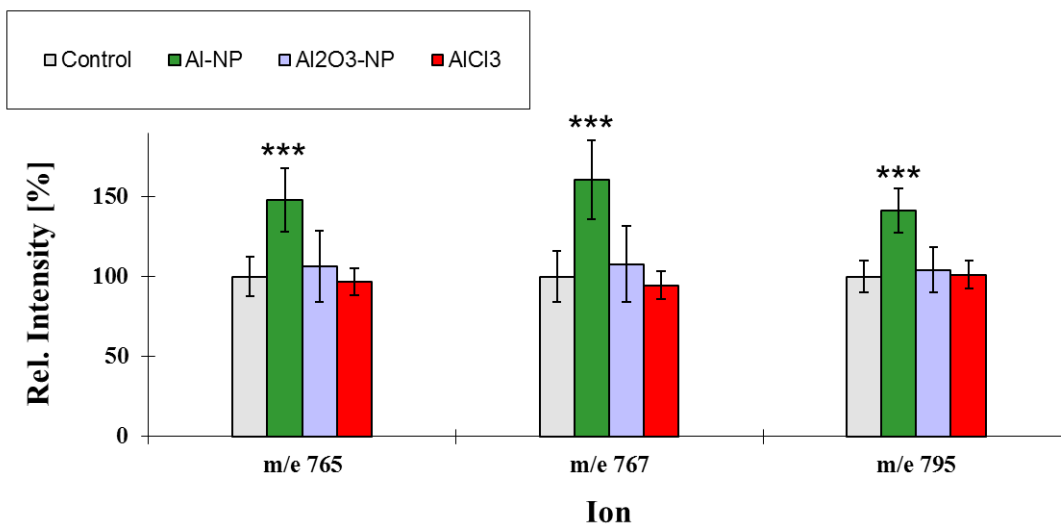

**Figure S4:** Histogram comparisons of ion yields for Ion m/e 765 (phosphatidylethanolamine, PE (C38:6)), ion m/e 767 (phosphatidylethanolamine, PE (C38:5)) and ion m/e 795 (phosphatidylethanolamine, PE (C40:5)).

5.3 Non-additive, particle specific metabolic effects in co-exposure experiments with Al<sub>2</sub>O<sub>3</sub> NM, Al<sup>0</sup>NM, AlCl<sub>3</sub>\*6H<sub>2</sub>O and high vitamin D3.

Synergistic effects with Al<sub>2</sub>O<sub>3</sub> NM in combination with high vitamin D3, which could not be observed in co-exposure experiments of all other combinations, were found (see Figure 13).

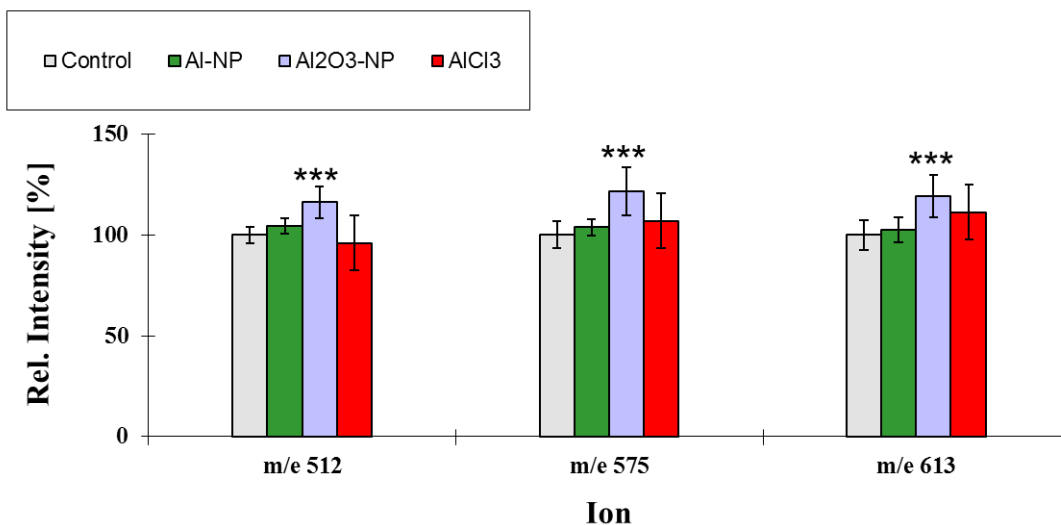

**Figure S5:** Histogram comparisons of ion yields for ion m/e 512 (lyso-phosphatidylserine, Lyso-PS (O-C18:0)), ion m/e 575 (diacylglycerol phosphate, DG (P-C34:3)) and ion m/e 613 (diacylglycerol, DG (C36:6)).

Additionally a synergistic and antagonistic effect could only be observed in co-exposure experiments with Al<sup>0</sup> NM and high vitamin D3 (see Figure 14).

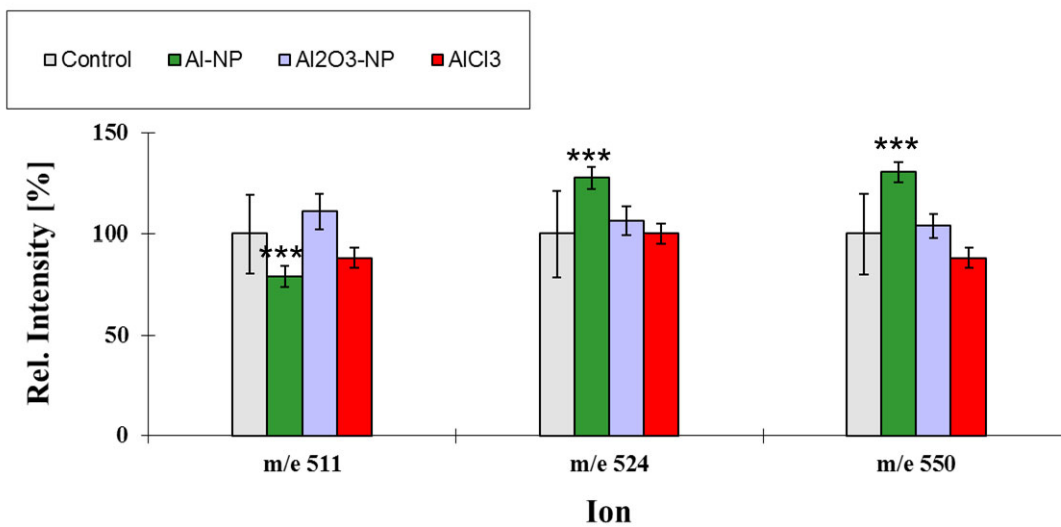

**Figure S6:** Histogram comparisons of ion yields for ion m/e 511 (diacylglycerol, DG (C28:1)), ion m/e 524 (lyso-phosphatidylcholine, Lyso-PC (C18:0)) and ion m/e 550 (lyso-phosphatidylcholine, Lyso-PC (C20:1)).
